# Supplementary material for: A Novel Method to Prepare Transparent, Flexible and Thermally Conductive Polyethylene/Boron Nitride Films
Source: MDPI journal article supplement (doi:10.3390/nano12010111), 2021-12-30
Supplement: s1 [file s1]

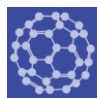

Supporting Information

## A Novel Method to Prepare Transparent, Flexible and Thermally Conductive Polyethylene/Boron Nitride Films

Mingming Yi <sup>1,2,†</sup>, Meng Han <sup>2,†</sup>, Junlin Chen <sup>1</sup>, Zhifeng Hao <sup>1,\*</sup>, Yuanzhou Chen <sup>1</sup>, Yimin Yao <sup>2</sup> and Rong Sun <sup>2,3</sup>

<sup>1</sup> School of Chemical Engineering and Light Industry, Guangdong University of Technology, Guangzhou 510006, China; 203701063@csu.edu.cn (M.Y.); 2112106060@mail2.gdut.edu.cn (J.C.); m15521162019@163.com (Y.C.)

<sup>2</sup> Shenzhen Institute of Advanced Electronic Materials, Shenzhen Institute of Advanced Technology, Chinese Academy of Sciences, Shenzhen 518055, China; meng.han@siat.ac.cn (M.H.); ym.yao@siat.ac.cn (Y.Y.); rong.sun@siat.ac.cn (R.S.)

<sup>3</sup> Shenzhen College of Advanced Technology, University of Chinese Academy of Sciences, Shenzhen 518055, China

\* Correspondence: haozf@gdut.edu.cn

† These authors contributed equally to this work.

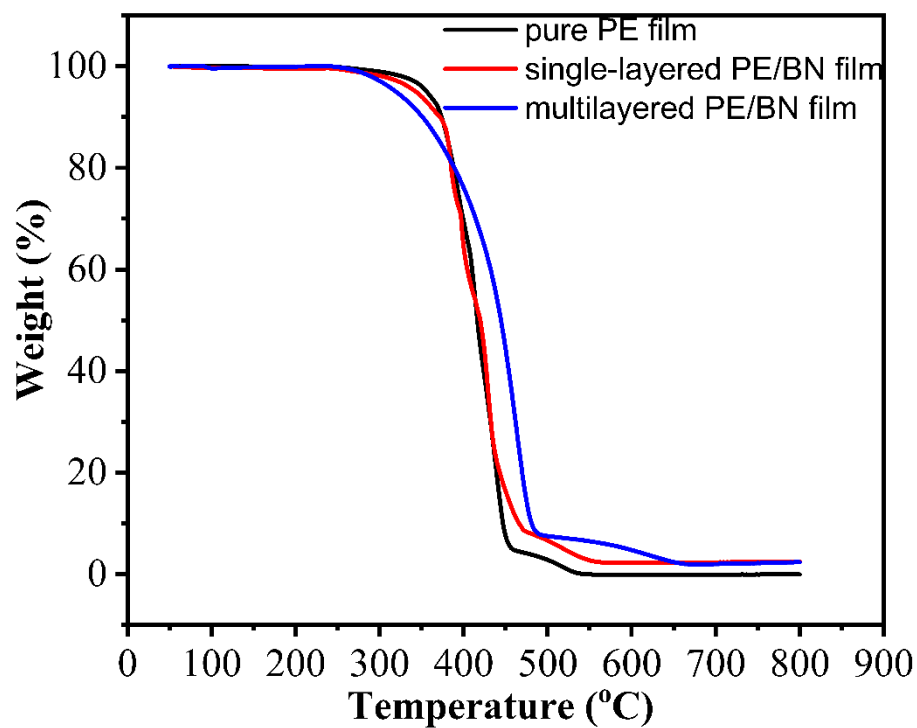

**Figure S1.** The TGA curve of pure PE film, single-layered PE/BNPs film and multilayered PE/BNPs film.

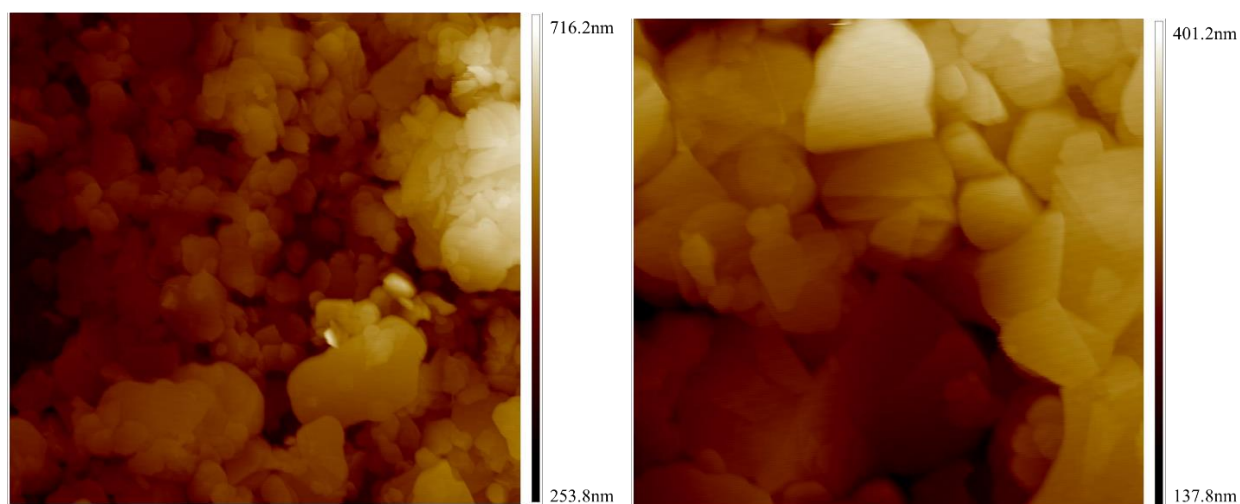

**Figure S2.** AFM image of single-layered PE/BNPs film.

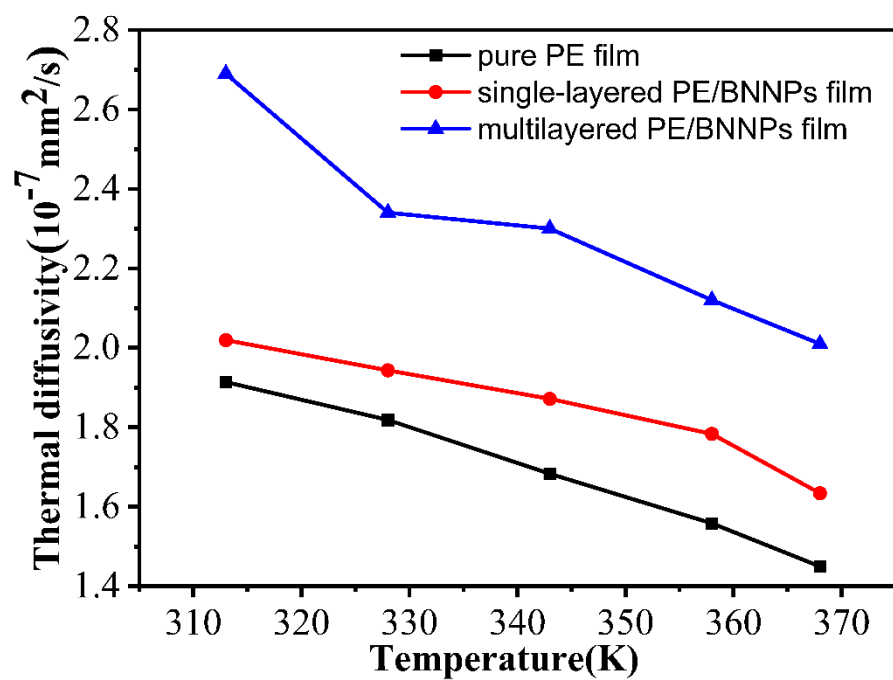

Figure S3. The calculated in-plane thermal diffusivity of different samples.

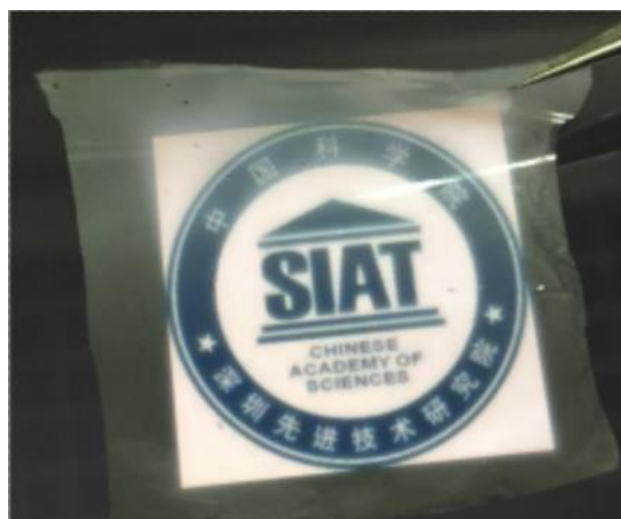

Figure S4. The optical photo of single-layered PE/BNNPs film.

The specific breakdown voltage was calculated from the Weibull distribution, as shown in following formula:

$$P = 1 - \exp \left[ - \left( \frac{E}{E_0} \right)^\beta \right] \quad (1)$$

Deriving this formula, the following formula can be obtained:

$$\ln[-\ln(1-P)] = \beta \ln E - \beta \ln E_0 \quad (2)$$

where  $P$  is the cumulative probability density of the electrical breakdown of the sample,  $\beta$  is the shape factor,  $E_0$  is the breakdown voltage. Equation 2 is the basis of the linear fitting in Figures S5–S7, where the slope and intercept can be used to calculate the breakdown voltage  $E_0$ . The errors induced from the linear fitting to the slope  $\beta$  and the intercept  $b = \beta \ln E_0$  has been considered in the following calculation of the breakdown voltage.

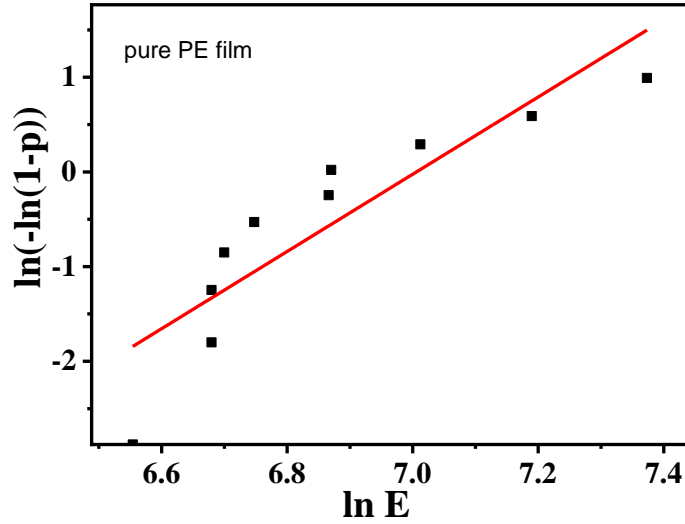

**Figure S5.** Linear fitting of  $\ln[-\ln(1-P)]$  versus  $\ln E$  of pure PE film. (The slope is  $4.08 \pm 0.73$ , the intercept is  $-28.58 \pm 5.01$  and the corresponding R-square value is 77.06%).

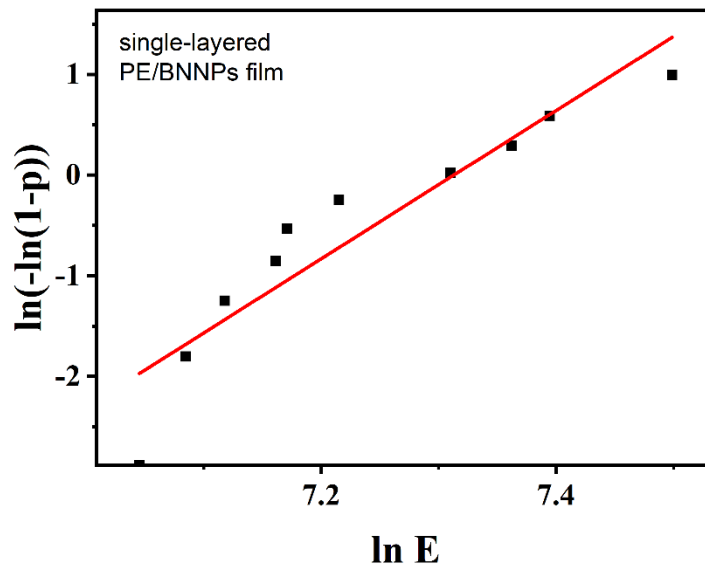

**Figure S6.** Linear fitting of  $\ln[-\ln(1-P)]$  versus  $\ln E$  of single-layered PE/BNNPs film. (The slope is  $7.36 \pm 1.01$ , the intercept is  $-53.82 \pm 7.21$  and the corresponding R-square value is 85.61%).

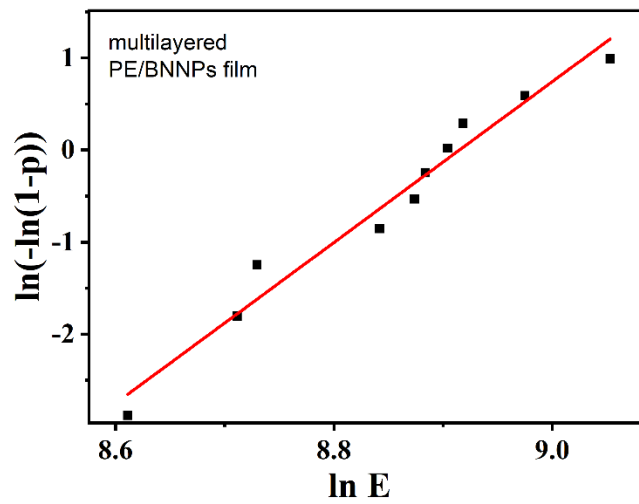

**Figure S7.** Linear fitting of  $\ln[-\ln(1-P)]$  versus  $\ln E$  of multilayered PE/BNNPs film. (The slope is  $8.73 \pm 0.56$ , the intercept is  $-77.83 \pm 4.98$  and the corresponding R-square value is 96.39%).
